# 1 One Health Intervention Strategies to Address Zoonotic Neglected Tropical 2 Diseases in Southeast Asia: A Scoping Review

3 Agrin Zauyani Putri<sup>1</sup>, Adarsh Varghese George<sup>1</sup>, Shannon A. McMahon<sup>1,2</sup>, Claire J. Standley<sup>1,3\*</sup>

4 <sup>1</sup>Heidelberg Institute of Global Health (HIGH), Heidelberg University, Heidelberg, Germany

5 <sup>2</sup>John Hopkins Bloomberg School of Public Health, Baltimore, Maryland, United States of  
6 America

7 <sup>3</sup>Center for Global Health Science and Security, Georgetown University, Washington, DC, United  
8 States of America

9 \*Corresponding author: [Claire.standley@georgetown.edu](mailto:Claire.standley@georgetown.edu)

## 10 Abstract

### 11 Background

12 Neglected tropical diseases (NTDs) affect over 1 billion people worldwide, causing life-long  
13 disabilities and death. Many of the 20 NTDs prioritized by the World Health Organization are  
14 zoonotic, spreading between animals and humans. Southeast Asia faces a significant NTD  
15 burden, including zoonotic parasitic infections like echinococcosis, taeniasis/cysticercosis, and  
16 foodborne trematodiasis (FBT). Despite recent research and programs emphasizing the  
17 importance of One Health efforts, there is limited insight into their implementation. This  
18 scoping review explores existing approaches for multi- and cross-sectoral engagement with  
19 respect to three parasitic zoonotic NTDs in Southeast Asia. Additionally, we aimed to synthesize

20 the One Health practices and advocate effective strategies for region-specific collaboration to  
21 tackle parasitic zoonotic NTDs.

## 22 **Methodology and principal findings**

23 We utilized the five-step framework of Arskey and O'Malley to conduct this scoping review. We  
24 systematically searched Pubmed, Web of Science, and Medline for peer-reviewed literatures. A  
25 total of 1725 publications were screened for eligibility and 105 publications identified for full-  
26 text screening. Fifteen (15) publications met our inclusion criteria, and we examined them for  
27 key themes related to One Health intervention strategies. Five themes emerged from our  
28 analysis: 1) health education, 2) treatment, 3) WASH practices, 4) ecosystem monitoring, and 5)  
29 surveillance and diagnostics. Additionally, we identified challenges cited during the  
30 implementation process, which included limited resources, community engagement,  
31 coordination and collaboration, and political commitment.

## 32 **Conclusions**

33 The importance of adopting a comprehensive strategy is strongly supported by the literature  
34 and WHO's emphasis on One Health in the new NTD Road Map. While there are examples of  
35 One Health approaches being implemented to control parasitic zoonotic NTDs, the application  
36 of One Health strategies is not consistent throughout the Southeast Asia region. Therefore,  
37 there are valuable opportunities to develop an implementation research agenda and enhance  
38 regional coordination mechanisms. Additionally, future potential strategies should consider  
39 determinants of health in NTDs through a multi-sectoral lens.

## 40 **Author Summary**

41 Southeast Asia is among the top-three regions reported requiring interventions against NTDs,  
42 including those which can be transmitted between humans and animals (known as zoonotic  
43 diseases), such as foodborne trematodiasis (FBT), taeniasis/cysticercosis, and echinococcosis.  
44 Taeniasis/cysticercosis, a pig-associated zoonotic disease, is a major cause of epilepsy due to  
45 brain infection, while FBT is a major cause of aggressive cancer known as cholangiocarcinoma  
46 and can also cause pulmonary infections that are usually misdiagnosed. Additionally,  
47 echinococcosis is a disease that causes cysts in the liver, lungs, and other organs. Although One  
48 Health has been advocated as an important approach to control zoonotic NTDs, there remains  
49 limited knowledge regarding the implementation of these approaches in Southeast Asia region.  
50 We conducted a scoping review to identify ways in which multisectoral and One Health  
51 approaches have been used in Southeast Asia to prevent and control FBT,  
52 taeniasis/cysticercosis, and echinococcosis. We found that examples for control of FBT and  
53 taeniasis/cysticercosis, but none for echinococcosis, and distribution was not consistent  
54 throughout the countries in the region. To this end, we suggest further implementation  
55 research as well as leveraging regional coordination mechanisms could be beneficial to further  
56 advance One Health as a tool for managing zoonotic NTDs in Southeast Asia.

## 57 **Introduction**

58 Neglected Tropical Diseases (NTD) disproportionately affect poor populations and cause  
59 chronic life-long disabilities and even death if left untreated (1,2). Despite harming the health,  
60 social wellbeing and economic development of more than 1 billion people worldwide (3), these

61 diseases receive comparatively less attention in the global health agenda and little funding and  
62 research (4). Among the 20 NTDs that the World Health Organization (WHO) prioritizes, 10 are  
63 zoonoses, meaning they can be transmitted between humans and other animals: rabies,  
64 scabies, dracunculiasis, trypanosomiasis, Chagas diseases, leishmaniasis, leptospirosis,  
65 echinococcosis, taeniasis/cysticercosis, and FBT. Zoonotic diseases primarily occur in  
66 communities where people work and live closely together with animals (5,6), and can be  
67 especially devastating because they not only cause human illness but also harm livestock,  
68 thereby reducing a family's income and sources of nutrition (6). Moreover, in neglected  
69 parasitic diseases, the role of animals in transmission is often overlooked even through  
70 breaking a parasites' life cycle is critical to control and eliminate diseases.

71 To effectively prevent and eliminate NTDs, a range of public health actions, health  
72 promotion efforts, and medical interventions are necessary (7,8). Integrated approaches, such  
73 as the One Health approach, are needed to address zoonotic diseases through cross-cutting  
74 activities that involve multiple sectors (8,9). The One Health approach recognizes the  
75 interconnectedness of human, animal, and environmental health, and seeks to address health  
76 issues at their intersection and in interdisciplinary manner (10,11). Implementing a One Health  
77 approach can help ensure that NTD control and elimination efforts are sustainable and effective  
78 (8). In 2020, the WHO developed the NTD Road Map for 2021-2030. This road map seeks to end  
79 fragmented implementation of NTD programs by advocating for integrated approaches, such as  
80 One Health, through cross-cutting activities involving multiple diseases. The road map provides  
81 a guide and resource for countries that are interested in addressing NTDs (12). There are five  
82 core strategies that WHO recommends in order to control NTDs: Individual disease

83 management; preventive chemotherapy; vector control; veterinary public health; and water,  
84 sanitation, and hygiene (WASH), within a systemic and cross-cutting approach (8).

85 Southeast Asia is among the top three regions of the world heavily burdened with NTDs  
86 (5,13). Of the NTDs present in the region, FBT, taeniasis/cysticercosis and echinococcosis, all  
87 neglected parasitic zoonosis, are responsible for a substantial burden of disease in the region  
88 (14–17). A severe infection caused by these parasites can be fatal and result in long-lasting  
89 problems such as malnutrition, anemia, growth and cognitive impairment, and a decreased  
90 ability to tolerate co-infection with other diseases (18–22). Historically, vertical disease control  
91 efforts using mass drug administration (MDA) of antihelminthic medication, have been promoted  
92 across all endemic regions in order to lower the prevalence of parasitic NTDs infections (23,24).  
93 However, these MDA approaches have not mitigated long-term impacts on transmission -  
94 despite successfully reducing incidence in the short term. For example, a study in Vietnam  
95 showed high reinfection rates within the first year of the last MDA programs for FBT and  
96 taeniasis (25). Additionally, reinfections have also been reported in settings that were  
97 previously certified as having eradicated guinea worm diseases (GWD)— due to the persistence  
98 of animal hosts that maintain transmission (26–29). The complexity of zoonotic parasitic life  
99 cycles, which often involve snails as intermediate hosts, animal reservoir hosts, and both animal  
100 and human definitive hosts, means that elimination and control of the diseases require a solid  
101 One Health approach (30).

102 There has been a growing number of One Health related global, regional, and national  
103 initiatives in Southeast Asia, including some to tackle NTDs in particular. These efforts reflect a  
104 growing recognition of the importance of a holistic approach. Notably, four international

105 agencies (WHO, FAO, WOA, UNEP) have recently developed a collaborative One Health Joint  
106 Plan of Action to control and eliminate NZDs. Examples of national initiative can be seen in  
107 Indonesia with respect to controlling rabies and foodborne diseases, as well as through the  
108 Mekong Basin Diseases Surveillance (MBDS) network as regional cooperation among 6  
109 countries (31).

110 Despite evidence of the importance of One Health for NTD control, and the existence  
111 of projects and policies citing One Health approaches, limited information exists regarding how  
112 the strategy can best be delivered to tackle parasitic zoonotic NTDs in Southeast Asia. To  
113 address this gap, we conducted a scoping review to explore aspects of multi- or cross-sectoral  
114 engagement in controlling echinococcosis, taeniasis/cysticercosis, and FBT in Southeast Asia.  
115 We aimed to synthesize effective One Health practices that could be beneficially applied in  
116 other countries in the region, and to then highlight effective strategies for region-specific  
117 collaboration to tackle parasitic zoonotic NTDs.

## 118 **Methods**

119 The scoping review approach was based on the methodological framework by Arksey  
120 and O'Malley (32). The five stages of the framework consist of: 1) identifying the research  
121 question, 2) identifying relevant studies, 3) selecting studies, 4) charting the data, and 5)  
122 summarizing and reporting the findings.

123 We conducted a scoping review on intervention strategies using the One Health  
124 approach on three zoonotic NTDs known to be of public health importance in Southeast Asia:  
125 echinococcosis, taeniasis/cysticercosis, and FBT. Our target study area was Southeast Asia, as

126 defined by membership in the Association of Southeast Asian Nations (ASEAN), namely:  
127 Indonesia, Philippines, Malaysia, Vietnam, Cambodia, Thailand, Lao PDR, Myanmar, Singapore,  
128 Brunei, and Timor-Leste.

129

## 130 Identification of relevant studies

131 The lead author searched PubMed, Web of Science, and Medline using structured search terms:  
132 [list of diseases] AND [list country settings] AND [list of integrated/collaborated intervention]  
133 (S1 Table). English-language articles published from January 2005 to December 2020 were  
134 included if they contained information about interdisciplinary, multidisciplinary, or One Health  
135 intervention strategies with respect to the diseases and countries of interest (Table 1). The  
136 2005-2020 window was selected as these dates mark cornerstones for One Health. In 2005, a  
137 year after the publication of the “Manhattan Principles on One World – One Health”, the  
138 phrase “One Health” entered the scientific and programmatic literature. The final month of  
139 2020 marks a logical endpoint for this research given that, in January 2021, the WHO published  
140 their new Road Map on NTDs, which aims to reduce the number of people in need of NTDs  
141 treatment, reduce DALYs, and eliminate and eradicate several NTDs by 2030.

142

### 143 Table 1. Inclusion and exclusion Criteria

| Criterion        | Inclusion                                                                                                                                 | Exclusion                                                                                       |
|------------------|-------------------------------------------------------------------------------------------------------------------------------------------|-------------------------------------------------------------------------------------------------|
| Literature focus | • Studies that include information about multisectoral/one health intervention strategies on Taeniasis/Cysticercosis, Echinococcosis, and | Studies that do not include information about multisectoral/one health intervention strategies. |

---

|                  |                                                                                                                                                                                     |                                                                                                    |
|------------------|-------------------------------------------------------------------------------------------------------------------------------------------------------------------------------------|----------------------------------------------------------------------------------------------------|
|                  | Foodborne trematodiasis<br>( <i>Clonorchis spp.</i> , <i>Opisthorchis spp.</i> , <i>Fasciola spp.</i> , <i>Paragonimus spp.</i> ).                                                  |                                                                                                    |
|                  | • Studies with a geographical focus on Southeast Asian countries: Brunei, Myanmar, Cambodia, Timor-Leste, Indonesia, Laos, Malaysia, Philippines, Singapore, Thailand, and Vietnam. |                                                                                                    |
| Language         | English                                                                                                                                                                             |                                                                                                    |
| Time Period      | 2005 to 2020                                                                                                                                                                        |                                                                                                    |
| Type of articles | Peer reviewed research papers                                                                                                                                                       | Articles that are abstract only and/or no retrievable full text, non-peer reviewed research papers |

---

144

## 145 **Data extraction and data analysis**

146 Two authors screened the papers independently based on the eligibility criteria and  
147 conferred on papers to include. All the studies were screened, first on an abstract/title level  
148 and the remaining full texts were subsequently read. Finally, the included papers were  
149 retrieved for final screening and data extraction. Data were collected and tabulated on a  
150 charting table sheet (S2 File) with three types of information related to the: publication, study  
151 setting, and intervention strategy. First, information was collected related to a publication's  
152 author, year of publication, title, and objectives of study. Second, details of a study setting were  
153 collected. Third, thematic categories relating to intervention strategies, attendant challenges,  
154 and study outcomes were derived through the full-text review and data extraction. For each  
155 included paper, the findings of the One Health intervention implementations were extracted,  
156 with particular attention to how study authors described any results with respect to  
157 effectiveness or other outcomes.



## 158 **Results**

159 In total 1540 publications were screened and assessed for eligibility based on inclusion and  
160 exclusion criteria (Fig 1), of which 105 full-texts were reviewed. A total of 90 full-text  
161 publications did not meet the inclusion criteria because their content was outside the scope of  
162 interest, abstract only, and/or written in languages other than English, leaving 15 final papers  
163 for synthesis.

164

165 **Fig 1. PRISMA diagram of articles identified and selected.**

166

## 167 **Characteristics of the included studies**

168 The 15 included studies were conducted in five countries (Fig 2), namely Lao People's  
169 Democratic Republic (Lao PDR) (33–36), Indonesia (37), Philippines (38–40), Vietnam (41–44),  
170 and Thailand (36,45,46). Studies focused on control of taeniasis/cysticercosis and FBT  
171 (*Clonorchis spp.*, *Opisthorchis spp.*, *Paragonimus spp.*); no study focused on echinococcosis.

172

173 **Fig 2. Map of the distribution of included papers in Southeast Asia.** Base map layer from

174 Natural Earth ([https://naciscdn.org/naturalearth/packages/Natural\\_Earth\\_quick\\_start.zip](https://naciscdn.org/naturalearth/packages/Natural_Earth_quick_start.zip)) and  
175 edited with QGIS.

176

## 177 **Key findings**

178 We identified five intervention themes from the included studies that highlight the nature of  
179 One Health in the control of taeniasis/cysticercosis and FBT within Southeast Asia. The

180 intervention themes were: health education; treatment; WASH practices; ecosystem  
181 monitoring; and surveillance and diagnostics. Each category of the themes was examined based  
182 on how the country implements it, multidisciplinary elements, the outcomes for NTD control,  
183 and implementation challenges. A summary of the One Health interventions as extracted from  
184 the papers is presented in Table 2.

**Table 2. A summary of interventions identified in the included studies.**

| Location                             | Major interventions                                                                                                                                                                                                                                                                                                                                                                                 |                                                                                                                                                 |                                                                                                                                                                                                                                                                                         |                                                                                                                                                    |                                                                                                                                                                                      |
|--------------------------------------|-----------------------------------------------------------------------------------------------------------------------------------------------------------------------------------------------------------------------------------------------------------------------------------------------------------------------------------------------------------------------------------------------------|-------------------------------------------------------------------------------------------------------------------------------------------------|-----------------------------------------------------------------------------------------------------------------------------------------------------------------------------------------------------------------------------------------------------------------------------------------|----------------------------------------------------------------------------------------------------------------------------------------------------|--------------------------------------------------------------------------------------------------------------------------------------------------------------------------------------|
|                                      | Education                                                                                                                                                                                                                                                                                                                                                                                           | Treatment                                                                                                                                       | WASH                                                                                                                                                                                                                                                                                    | Ecosystem Monitoring                                                                                                                               | Diagnostics and surveillance                                                                                                                                                         |
| <b>Foodborne trematodiasis (FBT)</b> |                                                                                                                                                                                                                                                                                                                                                                                                     |                                                                                                                                                 |                                                                                                                                                                                                                                                                                         |                                                                                                                                                    |                                                                                                                                                                                      |
| Thailand                             | <ul style="list-style-type: none"> <li>Community intervention: disseminated education through posters, flipcharts, videos, group discussions (36,45,46).</li> <li>Targeted intervention: provided training for health staff and village health volunteers (46).</li> <li>School-based intervention: creation of school curriculum on opisthorchiasis delivered by trained teachers (46).</li> </ul> | <ul style="list-style-type: none"> <li>Individual treatment*: adults, school-aged children (36,45,46), and infected animal (46).</li> </ul>     | <ul style="list-style-type: none"> <li>Community intervention: latrine installation, waste treatment. WASH practices (46).</li> </ul>                                                                                                                                                   | <ul style="list-style-type: none"> <li>Environment management of intermediate host (snail, cyprinid fish) elimination (45,46).</li> </ul>          | <ul style="list-style-type: none"> <li>Faecal examination: human (36,45,46), and animals (45,46).</li> </ul>                                                                         |
| Lao PDR                              | <ul style="list-style-type: none"> <li>Targeted intervention: creation of National School Health Policy (47).</li> </ul>                                                                                                                                                                                                                                                                            | <ul style="list-style-type: none"> <li>MDA: school-aged children with mebendazole (47).</li> </ul>                                              | <ul style="list-style-type: none"> <li>Targeted intervention: implemented hygiene programs in schools, emphasizing practices such as handwashing, toilet use, consuming clean food, wearing clean clothes, and maintaining a clean environment (47).</li> </ul>                         | -                                                                                                                                                  | <ul style="list-style-type: none"> <li>Faecal examination: human (47).</li> </ul>                                                                                                    |
| Vietnam                              | <ul style="list-style-type: none"> <li>Targeted intervention: special training targeting nursery farmers (41,42,44).</li> <li>Community intervention: educate household members to avoid eating raw fish and to prevent consumption of raw or dead fish by dogs, cats, and farm animals (41-43).</li> </ul>                                                                                         | <ul style="list-style-type: none"> <li>Individual treatment**: human in households (41-44) and animals with praziquantel (41,42,44).</li> </ul> | <ul style="list-style-type: none"> <li>Targeted intervention: sanitation program focusing on the safe disposal of human faeces and pig manure; provided hygiene instructions, including not consuming raw fish and refraining from feeding uncooked fish to animals (41-43).</li> </ul> | <ul style="list-style-type: none"> <li>Aquaculture management: pond management, snail control, and faecal pollution management (41-44).</li> </ul> | <ul style="list-style-type: none"> <li>Faecal examination: human, animals (41-44).</li> <li>Malacology: Snail sampling to check snail density and identification (42,44).</li> </ul> |

| <b>Taeniasis/cysticercosis</b> |                                                                                                                                                                                                                                                                                                                                                                    |                                                                                                                                                                             |                                                                                                                                                                                                                           |   |                                                                                                                                                                                                                                                                                                  |
|--------------------------------|--------------------------------------------------------------------------------------------------------------------------------------------------------------------------------------------------------------------------------------------------------------------------------------------------------------------------------------------------------------------|-----------------------------------------------------------------------------------------------------------------------------------------------------------------------------|---------------------------------------------------------------------------------------------------------------------------------------------------------------------------------------------------------------------------|---|--------------------------------------------------------------------------------------------------------------------------------------------------------------------------------------------------------------------------------------------------------------------------------------------------|
| Lao PDR                        | <ul style="list-style-type: none"> <li>Community intervention: disseminated education through leaflets and posters such as washing hands, cooking pork, penning pigs, using latrines (33–35).</li> <li>Community intervention: educated pig owners not to sell or consume treated pigs for at least one month after oxfendazole treatment (35).</li> </ul>         | <ul style="list-style-type: none"> <li>MDA*: adult and school-aged children (triple dose albendazole) (33–35) and pigs (oxfendazole and TSOL18 vaccine) (34,35).</li> </ul> | <ul style="list-style-type: none"> <li>Community intervention: involving posters with hygiene and sanitation messages, a program on latrine usage and handwashing (33,34), and conducted latrine surveys (34).</li> </ul> | - | <ul style="list-style-type: none"> <li>Faecal examination: human (33–35) and animals (33,34).</li> </ul>                                                                                                                                                                                         |
| Indonesia                      | <ul style="list-style-type: none"> <li>Community intervention: disseminated education through leaflets and posters (37).</li> <li>Targeted intervention: trained health personnel on how to diagnose and treat taeniasis (37).</li> <li>Targeted intervention: created guidelines on the prevention and control of the disease for health workers (37).</li> </ul> | <ul style="list-style-type: none"> <li>Individual treatment of adults with praziquantel (37).</li> </ul>                                                                    | -                                                                                                                                                                                                                         | - | <ul style="list-style-type: none"> <li>Establishment of integrated laboratory references and National Working Group (37).</li> <li>Meat inspection: determine the distribution of infected animals (37).</li> <li>Clinical examination: Diagnostic examination on pigs and dogs (37).</li> </ul> |
| Philippines                    | <ul style="list-style-type: none"> <li>Targeted intervention: capacity building for health workers to screen, interview, and perform sputum examinations on patients with a history of illness (38–40).</li> </ul>                                                                                                                                                 | <ul style="list-style-type: none"> <li>Individual treatment of adults with praziquantel (38–40).</li> </ul>                                                                 | -                                                                                                                                                                                                                         | - | <ul style="list-style-type: none"> <li>Integrated surveillance and diagnostics with the National Tuberculosis Control program (38–40).</li> </ul>                                                                                                                                                |

\* This MDA targeted soil-transmitted helminthiasis, another parasitic NTD which was not focused on in this scoping review.

\*\* This treatment was conducted as part of trial study with designated group, including intervention and non-intervention groups.

## **Interventions related to education**

Health education is a form of activity that includes knowledge improvement and development of life skills that are beneficial to both individual and community health. Therefore, any form of education that raises awareness and targets communities or specific groups of individuals is included under this theme. Education initiatives are often conducted in conjunction with other programs such as WASH program (33,34,41–43,46,47), surveillance and diagnostics (33–39,43,45–47), ecosystem and monitoring (41–46), and treatment in humans and/or animals (33–47).

The Lawa project in Thailand emphasized education interventions in community and school settings (45,46). The authors noted that a comprehensive training program aimed at various community leaders including hospital staffs, cooks, health volunteers, village committees, and teachers proved effective in preventing *Opisthorchis viverrini*. The Lawa project also trained health workers to screen and treat adults, while children were targeted with a deworming program at school and a special curriculum on opisthorchiasis delivered by trained teachers. Training materials that were used in the Lawa project ranged from posters, flip charts, videos, and group discussions, which emphasized the importance of WASH practices and explain the role of animal hosts. This approach to education dissemination was also implemented in two studies to address taeniasis/cysticercosis in Indonesia (37) and Lao PDR (47). The importance of school-based interventions for health education is also highlighted by a study from Yoshida et al. (47), which found that the Ministry of Education and the Ministry of Health in Lao PDR created a National School Health Policy that included a curriculum about FBT as well as a deworming program at school.

## **Interventions related to improving WASH practices**

Taeniasis/cysticercosis and FBT infection in Southeast Asia are linked to cultural and community behaviours, particularly in relation to fishing, latrine use, and food preparation. Raw

food consumption, such as *lawar* in Indonesia (37), raw pork in Lao PDR (34,35), raw freshwater crab in the Philippines (38,40), raw or fermented fish dishes in Thailand (36,45,46), and raw fish in Vietnam (41,44), present a source of infection for taeniasis and FBT infection. Therefore, WASH initiatives related to reducing the incidence of taeniasis/cysticercosis and FBT infection typically focused improving hygiene and sanitation practices, including with respect to food preparation and consumption.

WASH programs across countries in Southeast Asia were delivered alongside education and ecosystem monitoring interventions. Hygiene programs in the included studies were undertaken in Thailand (46), Lao PDR (33,34,47), and Vietnam (41–43), and aimed to educate individuals on handwashing, toilet use, and food preparation. While sanitation programs focused on conducting latrine surveys (47), installing latrines, and managing human and animal waste (41–43,46). In Lao PDR (34), the study highlighted that taeniasis/cysticercosis posters related to WASH were effective in increasing women’s knowledge about the disease, but were not successful for children and men.

## **Interventions via treatment**

Treatment is the administration of drugs for the purpose of promoting public health. One treatment approach for NTDs consists of mass drug administration (MDA), in which the whole population (or a particular sub-set of the population) are all targeted for treatment regardless of their infection status; another way of treatment is through medication only for infected individuals. MDA was only conducted in studies on FBT and taeniasis/cysticercosis in Lao PDR (33–35,47), while the remaining studies focused on individual treatment. In all

included studies where individual treatment was administered (36–46), treatment was preceded by stool examination as part of diagnostics and surveillance in animals and/or humans.

A study in Lao PDR demonstrated the implementation of an MDA program among adults and school-aged children against taeniasis/cysticercosis. Adults were given albendazole 400 mg over three consecutive days, while all pigs received anthelmintic oxfendazole 30 mg/kg and TSOL18 vaccine. This procedure was repeated one month later (33–35). This study aimed to not only to control taeniasis/cysticercosis but also soil-transmitted helminthiasis. Although surveillance measures showed an increment of soil-transmitted helminths among humans, taeniasis prevalence in humans was reduced after the first MDA. Studies conducted in Thailand , Lawa project, also mentioned the integration of treatment for opisthorchiasis within other programs (45,46). The project joined in other control programs aimed at helminths, vector-borne, and zoonotic diseases, administering praziquantel 40 mg/kg to reservoir hosts (cats and dogs) and infected human individuals.

Studies conducted in Vietnam demonstrated the positive effects of a holistic approach to treatment, incorporating ecosystem monitoring and community education, not only for humans but also for animals, as described in more detail in the next section. Faecal examinations conducted on humans and domestic animals revealed statistically significant reductions in the density and total count of FBT eggs (41–44) after the multisectoral interventions were implemented. Despite these promising results, challenges remain including the management of free-roaming domestic animals, which can impede efforts to control the spread of disease.

## **Interventions related to ecosystem monitoring**

Ecosystem monitoring plays an important role in controlling parasitic zoonotic NTDs by identifying areas of high risk and informing efforts to control disease, and can also incorporate control of intermediate hosts or vectors. Aquatic environments like lakes, rivers, and local ponds are often monitored to determine the prevalence and abundance of freshwater snails, which are the intermediate hosts of numerous zoonotic trematodes, in areas where FBT is endemic. This information is used to implement preventative measures like reducing snail populations, which in turn can help curb disease.

Studies in Vietnam (41–44) looked at the strong integration of ecosystems monitoring, diagnostics, treatment, and education interventions in the domain of One Health. The ecosystem was monitored focusing on aquaculture management practices such as pond management, snail control, and faecal pollution management. Investigators trained all household members including aquaculture farmers about the basic biology of FBT. Furthermore, the farmers were given specific instructions for pond nursery management. Instructions included redirecting human and pig waste away from ponds, installing fences around ponds (to prevent domestic animals from entering pond areas), applying water filters and removing vegetation. Additionally, intervention groups and animals were examined and treated with praziquantel. Results demonstrated that the prevalence of FBT eggs among cats and dogs decreased post-intervention compared to controls. However, the result also showed that improving pond and farm management practices can be effective even without drug treatment.

## **Intervention by surveillance and diagnostics**

Surveillance and diagnostics are critical in mapping the necessary tools and methods for effective disease intervention, as well as providing insights into environmental factors that



contribute to the infection cycle. Both surveillance and diagnostics were implemented to some degree in all included studies to evaluate intervention success and establish baseline information about taeniasis and FBT.

Faecal examination was one of the primary methods used in surveillance and diagnostic interventions. The One Health approach was specifically identified in studies where faecal examinations were conducted not only on human excrement but also on domestic animals (33,34,41–46). However, in studies in Lao PDR on FBT, diagnostics were only performed on humans (47). Studies conducted in the Philippines (38–40) emphasized the importance of routine surveillance and diagnostics for FBT integrated into health centres. A paragonimiasis control program was integrated within the National Tuberculosis Control Program due to their similarity of clinical symptoms and shared diagnostic methods. However, this integration only focused on human health and in this sense, was not an ideal example of a One Health approach. Nonetheless, the National Tuberculosis Control Program highlighted opportunities for integration and gaps for improvement. Similarly, Indonesia conducted passive surveillance at health centres and established collaboration activities with veterinary public health officials (37). This sector supported laboratory cooperation through the Bureau of Veterinary Research and Development and performed diagnostic examinations on pigs and dogs. The government also conducted meat inspections at registered slaughterhouses to determine the distribution of infected animals.

Indonesia and the Philippines faced similar challenges, such as limited personnel skills for laboratory diagnostics and program monitoring, infrastructure limitations for surveillance, and a lack of political commitment. These external factors have shown that these diseases are

not prioritized in the health agenda, and no clear cross-sectoral intervention guidelines were identified.

## **Challenges encountered during intervention implementation**

Four studies (41,44–46) identified budgeting and monitoring as the primary challenges for implementing One Health interventions. Delivering medication treatment for humans and animals over a long period of time can be expensive, and ensuring all hosts receive treatment is difficult, especially since farm owners sometimes bring in new cats and dogs without prior notice. The extent of community coverage of MDA in humans can be substantially affected by the time of day or day of the week; the efficacy of school-based MDA can be impacted by high rates of absenteeism or low school enrolment, which can particularly negatively affect girls' access to treatment (48). Bardosh et al. (34) also reported that the inadequate supply chain of porcine vaccines for taeniasis increased the likelihood of unsuccessful programs in Lao PDR, particularly in isolated villages. Studies also identified low personnel capacity as a hindrance to program implementation (34,37). A lack of trust in health interventions was identified as another challenge to the program's success. In Lao PDR, some parents did not allow their children to take anthelmintic during deworming programs in school as they feared side effects, as reported by Okello et al. (35). Hygiene and sanitation practices were challenging to improve, as culturally determined behaviours continued to hinder education and WASH interventions. Bardosh et al. (34) and Ash et al. (33) found that many villagers in Lao PDR were unwilling to build or use cement latrines and continued unhygienic cooking, which increased reinfection.

Political commitment with effective coordination is critical for the sustained implementation of One Health programs. However, a study in Indonesia highlighted that

government resources and priorities were not focused on taeniasis control, but other diseases for example polio, HIV/AIDS, malaria, and dengue which were supported by international agencies. Thus a more efficient way to control taeniasis was averted (37). In the Philippines, the absence of guidelines and measurements for an integrated paragonimiasis control program with the tuberculosis national program lead to low implementation rates (38). Delos Trinos et al. (40) found that MDA guidelines from the Philippines government were not aligned with recommendations from the WHO to control FBT.

## Discussion

This scoping review presents the multi/cross-sectoral engagement in controlling parasitic zoonotic NTDs and highlights the challenges of implementing One Health approaches in Southeast Asia. In addition to being implemented singly, some of the thematic interventions we identified in the review were implemented together with others, including both multisectoral and unisectoral efforts. For example, our review revealed that education interventions, specifically those emphasizing WASH practices, were frequently implemented alongside treatment interventions for disease control. However, the positive impact of even these multi-layered interventions was not always demonstrated. In Lao PDR, despite extensive implementation of health education and deworming programs for school-age children, the prevalence of *Opisthorchis sp.* infection remained high at 39% (47). A meta-analysis by Naqvi et al. (49) found that the impact of health education on NTDs is uncertain, although it may reduce the intensity and prevalence of schistosomiasis, another parasitic NTD, among children and adolescents. In this scoping review, health education material often consisted of posters and

leaflets, but according to Hasanica et al. (50), these were ineffective tools to improve children's knowledge about NTDs. Considering the need for behavioural change for sustainable impacts on NTDs, alternative health education tools are necessary. For example, a pilot study in Nigeria used the board game "Schisto and Ladders version 2" to increase schistosomiasis knowledge, resulting in a significant change in treatment-seeking behaviour from 0% to 65.3% (51), suggesting that gamification may be more effective than text-based media in some contexts.

It has been known the exact effect of WASH interventions on NTD prevention and control is difficult to determine due to insufficient conclusive evidence (52). A review by Garn et al. (53) found that increased latrine coverage or improvements do not necessarily result to an increase in usage. Factors influencing latrine use include latrine types, accessibility, privacy, cleanliness, hygiene amenities, functionality, and maintenance. Furthermore, the study by Bardosh et al. (34) highlights a gender-based difference in sanitary infrastructure usage due to their roles. In the study, the educational material mainly improved women's knowledge and raised their awareness for sanitary conditions, while it barely affected men and children. Therefore, gender analysis is critically needed to explore opportunities for a more gender-responsive approach in health interventions. The WHO NTD road map also clearly highlights the importance of ensuring gender equity and human rights in all services provided for NTDs (8).

Preventive chemotherapy and treatment are key WHO-recommended interventions for NTD prevention and control, but strategies focused exclusively on humans show limited results. In Madagascar, a three-year pilot study found that mass drug administration (MDA) reduced taeniasis prevalence by 80%, however, prevalence returned to baseline levels 16 months after the final MDA round (54). This highlights the need for One Health approach that includes

intermediate hosts like pigs in the intervention strategies. The included studies showed excellent results by implementing interventions on pigs by using a combination of TSOL18 vaccine, which has proven to be the most effective vaccine against *T. solium*, and oxfendazole to reduce source of taeniasis infection in humans. This successful approach was also reported from a study in Uganda (55) as well as using combination of TSOL16 and TSOL18 in Peru (56). Another study in Morocco suggested that EG95 vaccination on sheep reduce the level of cystic echinococcosis (57). This emphasizes the importance of employing an integrated approach rather than a siloed one to address zoonotic diseases challenges. Additionally, co-administering anthelmintic drugs to control multiple diseases also presents a promising example of integration within health sectors even though it may not be specifically multisectoral or an example of One Health.

This review also found that ecosystem monitoring was an integral part of the One Health intervention program in several studies, particularly in controlling FBT opisthorchiasis in Vietnam and Thailand (41–44,46). The studies from Vietnam demonstrated that pond modifications are an effective method of infection prevention. The results revealed that solely improving pond and farm management can decrease opisthorchiasis and clonorchiasis infection rates in humans and animals. However, a comprehensive approach is necessary, as a mathematical modelling study (58) indicates that the optimal strategy for reducing parasite infection involves both safe fish production and routine human treatment. The cost-effectiveness of ecosystem monitoring as an intervention should be considered. Implementing pond modifications and treatment demands significant commitment and resources. A farmer's decision to adapt control measures may be influenced by socio-cultural and economic factors

(59). Transitioning from traditional agricultural practices requires a fundamental shift in perspective, which can pose financial challenges for small-scale farmers. Consequently, further research into biological alternatives for controlling infections in fish is needed, along with the establishment of official guidelines on sustainable farm practices to prevent infections (60).

Continuous monitoring and evaluation of livestock, domestic animals, and humans are essential for identifying areas that need further intervention. Surveillance and diagnostics in humans and animals play a crucial role in One Health. The result of surveillance is useful to map areas or regions where interventions should be introduced, monitoring drug efficacy and resistance (61). Faecal examination, with its non-invasive nature and ease of sample collection, is frequently employed for diagnosing FBT and taeniasis infections (62,63). The study from Indonesia demonstrates successful intersectoral collaboration through passive surveillance efforts, showcasing the use of a veterinary laboratory as a reference for taeniasis detection (37). This approach highlights the importance of national financial commitment and strong institutional engagement in sustaining the One Health approach (64). The included studies in the Philippines also revealed the potential for integrating diagnostic programs for *Paragonimus sp.* and tuberculosis, given their shared symptoms and diagnostic methods (38–40). Although not directly related to One Health, such integration can help overcome the problem of insufficient test availability mentioned in a review by Bharadwaj et al. (65).

Integrating NTDs into a pre-existing initiative holds a potential to bolster the sustainability and efficiency of NTDs program management. Initiatives like the establishment of a regional network such as Mekong Basin Disease Surveillance has showcased significant advancements in enacting strategies for epidemic preparedness and response within a One

Health framework. Although the focus of this regional network is around emerging infectious disease and epidemic threats, there lies a promising opportunity by incorporating NTDs. For instance, the case of Salmonellosis, a bacterial infection often linked to contaminated food. By focusing on hygienic practices within the food supply chain, not only can the risk of NTD transmission be minimized, but the occurrence of Salmonellosis and other foodborne NTDs can also be minimized. Furthermore, considering the zoonotic nature of FBT, joint interventions with other diseases should be considered and tailored to each country's disease situation, taking animal health sectors into account. For instance, Morocco implemented a combination of rabies vaccination, insecticidal collars for leishmaniasis control, and anthelmintic drugs for echinococcosis (66). This scoping review is subject to certain limitations. Our review was limited to online resources that are available in English, so there is a possibility that we have missed relevant studies that have been published in other languages or are not available electronically. Additionally, the exclusion of grey literature may have resulted in missing information from ministries, non-governmental organizations, and other sources that share information on One Health intervention approaches through non-peer reviewed means. Despite these limitations, the discussion and findings summarized through key themes in this study certainly help to improve understanding of the One Health practices to advocate effective strategies for region-specific collaboration to tackle parasitic zoonotic NTDs.

To move forward in effectively controlling zoonotic NTDs, high-level decision-makers need to implement the One Health approach comprehensively. While there is a growing recognition of the importance of One Health in zoonotic NTD control efforts, it is crucial to define a research agenda and put it into practice through country or regional level initiatives.

Coordination of this kind has been developed in certain regions, such as ECOWAS in West Africa, and has been a call to action in the European Union.

## Conclusion

In conclusion, this scoping review highlights the importance and need of implementing One Health approaches rather than a siloed approach for controlling three parasitic zoonotic NTDs in Southeast Asia. However, the application of One Health strategies is not consistent throughout the countries in the Southeast Asia region, nor for diseases. For example, we could not find any studies on One Health strategies for echinococcosis, indicating a research gap. The review identifies five main interventions that demonstrate the One Health domain, including education, treatment, WASH practices, ecosystem monitoring, and surveillance and diagnostics. However, there are challenges in implementing the One Health approach for controlling zoonotic NTDs, including limited resources, community engagement, coordination and collaboration, and political commitment. Therefore, substantial work remains to be done. Continuous monitoring and evaluation of livestock, domestic animals, and humans are essential for identifying areas that need further intervention. Additionally, future potential strategies should consider determinants of health in NTDs while involve a multi-sectoral approach, including mainstreaming gender, equity, and human rights in NTD services. Integrating NTDs into broader initiatives like regional disease surveillance networks demonstrates potential synergies for efficient and sustainable management. Such initiatives can extend the impact of One Health practices, addressing not only NTDs but also other related health threats. This



review also encourages decision-makers to establish coordination mechanisms in ASEAN level, drawing successful example like ECOWAS.

## Supporting information

**S1 Table. Structure of search terms.**

**S2 File. Data extraction tables**

## Author contributions

Conceptualization: Agrin Zauyani Putri, Claire J. Standley

Data curation: Agrin Zauyani Putri, Adarsh Varghese George

Formal analysis: Agrin Zauyani Putri, Adarsh Varghese George

Investigation: Agrin Zauyani Putri, Adarsh Varghese George

Methodology: Agrin Zauyani Putri, Adarsh Varghese George, Claire J. Standley

Project administration: Agrin Zauyani Putri, Claire J. Standley, Shannon A. McMahon

Supervision: Claire J. Standley

Validation: Claire J. Standley

Visualization: Agrin Zauyani Putri

Writing – original draft: Agrin Zauyani Putri

Writing – review & editing: Agrin Zauyani Putri, Claire J. Standley, Shannon A. McMahon

It is made available under a [CC-BY 4.0 International license](#) .

## References

1. Álvarez-Hernández DA, Rivero-Zambrano L, Martínez-Juárez LA, García-Rodríguez-Arana R. Overcoming the global burden of neglected tropical diseases. *Therapeutic Advances in Infectious Disease*. 2020;7:1–3.
2. Molyneux D. Neglected tropical diseases. *Community Eye Health*. 2013;26(82):24.
3. World Health Organization. Neglected tropical diseases - GLOBAL [Internet]. [cited 2023 May 7]. Available from: <https://www.who.int/health-topics/neglected-tropical-diseases>
4. Shahvisi A. Tropicality and abjection: What do we really mean by “Neglected Tropical Diseases”? *Developing World Bioethics*. 2019 Dec 1;19(4):224–34.
5. Dash AP, Revankar C. Neglected tropical diseases targeted for elimination in South-East Asia - Progress so far. *International Journal of Infectious Diseases*. 2012 Jun;16.
6. Molyneux D, Hallaj Z, Keusch GT, Mcmanus DP, Ngowi H, Cleaveland S, et al. Zoonoses and marginalised infectious diseases of poverty: Where do we stand? *Parasites & Vectors*. 2011;4.
7. Ackley C, Elsheikh M, Zaman S. Scoping review of Neglected Tropical Disease Interventions and Health Promotion: A framework for successful NTD interventions as evidenced by the literature. *PLoS neglected tropical diseases*. 2021 Jun 6;15(7):1–31.
8. World Health Organization. Ending the neglect to attain the Sustainable Development Goals: A road map for neglected tropical diseases 2021–2030 [Internet]. 2021. Available from: <http://apps.who.int/bookorders>.
9. Peterson JK, Bakuza J, Standley CJ. One Health and Neglected Tropical Diseases—Multisectoral Solutions to Endemic Challenges. *Tropical Medicine and Infectious Disease*. 2020 Dec 29;6(1):4.
10. Bidaisee S, Macpherson CNL. Zoonoses and One Health: A Review of the Literature. *Journal of Parasitology Research*. 2014;2014:1–8.
11. World Health Organization, Food and Agriculture Organization of the United Nations, World Organisation for Animal Health. Taking a multisectoral, one health approach: a tripartite guide to addressing zoonotic diseases in countries [Internet]. Geneva: World Health Organization; 2019 [cited 2022 May 29]. Available from: <https://apps.who.int/iris/handle/10665/325620>
12. Casulli A. New global targets for NTDs in the WHO roadmap 2021–2030. *PLOS Neglected Tropical Diseases*. 2021 May 1;15(5):1–10.

13. World Health Organization. The Global Health Observatory. [cited 2022 May 31]. Reported number of people requiring interventions against NTDs. Available from: <https://www.who.int/data/gho/data/indicators/indicator-details/GHO/reported-number-of-people-requiring-interventions-against-ntds>
14. Gongal G, Ofrin RH, De Balogh K, Oh Y, Kugita H, Dukpa K. Operationalization of One Health and Tripartite Collaboration in the Asia-Pacific Region. *WHO South-East Asia Journal of Public Health*. 2020;9(1):21–5.
15. Sato MO, Adsakwattana P, Fontanilla IKC, Kobayashi J, Sato M, Pongvongsa T, et al. Odds, challenges and new approaches in the control of helminthiasis, an Asian study. *Parasite Epidemiol Control*. 2019 Feb;4:e00083.
16. Garjito TA, Mujiyanto M, Sudomo M. Echinococcosis: Past and Present Situation in Southeast Asia. Overview on Echinococcosis [Internet]. 2019 Dec 13 [cited 2022 Feb 25]; Available from: <https://www.intechopen.com/chapters/70458>
17. Waikagul J, Dekumyoy P, Anantaphruti MT. Taeniasis, cysticercosis and echinococcosis in Thailand. *Parasitology international* [Internet]. 2006 [cited 2022 Jun 12];55 Suppl(SUPPL.). Available from: <https://pubmed.ncbi.nlm.nih.gov/16338166/>
18. Okello AL, Burniston S, Conlan JV, Inthavong P, Khamlome B, Welburn SC, et al. Review Article: Prevalence of Endemic Pig-Associated Zoonoses in Southeast Asia: A Review of Findings from the Lao People’s Democratic Republic. *Am J Trop Med Hyg*. 2015;92(5):1059–66.
19. Rottbeck R, Nshimiyimana JF, Tugirimana P, Düll UE, Sattler J, Hategekimana JC, et al. High Prevalence of Cysticercosis in People with Epilepsy in Southern Rwanda. *PLoS Neglected Tropical Diseases*. 2013;7(11).
20. McManus DP. Echinococcosis with Particular Reference to Southeast Asia. *Advances in Parasitology*. 2010 Jan 1;72(C):267–303.
21. Diemert DJ. Cestode and Trematode Infections. In: *Infectious Diseases*. Elsevier; 2017. p. 1032-1037.e1.
22. Petney TN, Sithithaworn P, Andrews RH, Webster JP. Foodborne trematodes: a diverse and challenging group of neglected parasites. *Transactions of the Royal Society of Tropical Medicine and Hygiene*. 2016 Dec 11;110(1):1–3.
23. Barry MA, Simon GG, Mistry N, Hotez PJ. Global trends in neglected tropical disease control and elimination: impact on child health. *Archives of Disease in Childhood*. 2013 Aug 1;98(8):635–41.

24. Summary of global update on implementation of preventive chemotherapy against NTDs in 2020 [Internet]. [cited 2023 Feb 9]. Available from: <https://www.who.int/publications-detail-redirect/who-wer9638-468-475>
25. Lier T, Do DT, Johansen MV, Nguyen TH, Dalsgaard A, Asfeldt AM. High Reinfection Rate after Preventive Chemotherapy for Fishborne Zoonotic Trematodes in Vietnam. *PLoS Negl Trop Dis*. 2014 Jun 19;8(6):e2958.
26. Cairncross S, Muller R, Zagaria N. Dracunculiasis (Guinea Worm Disease) and the Eradication Initiative. *Clinical Microbiology Reviews*. 2002 Apr;15(2):223–46.
27. Thiele EA, Eberhard ML, Cotton JA, Durrant C, Berg J, Hamm K, et al. Population genetic analysis of Chadian Guinea worms reveals that human and non-human hosts share common parasite populations. *PLOS Neglected Tropical Diseases*. 2018 Oct 4;12(10):e0006747.
28. McDonald RA, Wilson-Aggarwal JK, Swan GJF, Goodwin CED, Moundai T, Sankara D, et al. Ecology of domestic dogs *Canis familiaris* as an emerging reservoir of Guinea worm *Dracunculus medinensis* infection. *PLOS Neglected Tropical Diseases*. 2020 Apr 20;14(4):e0008170.
29. Boyce MR, Carlin EP, Schermerhorn J, Standley CJ. A one health approach for guinea worm disease control: scope and opportunities. *Tropical Medicine and Infectious Disease*. 2020 Oct 13;5(4).
30. Karesh WB, Dobson A, Lloyd-Smith JO, Lubroth J, Dixon MA, Bennett M, et al. Ecology of zoonoses: natural and unnatural histories. *Lancet*. 2012 Dec 1;380(9857):1936–45.
31. Vandersmissen A, Welburn SC. Current initiatives in One Health: consolidating the One Health Global Network. *Rev Sci Tech*. 2014 Aug;33(2):421–32.
32. Arksey H, O'Malley L. Scoping studies: Towards a methodological framework. *International Journal of Social Research Methodology: Theory and Practice*. 2005 Feb;8(1):19–32.
33. Ash A, Okello A, Khamlome B, Inthavong P, Allen J, Thompson RCA. Controlling *Taenia solium* and soil transmitted helminths in a northern Lao PDR village: Impact of a triple dose albendazole regime. *Acta tropica*. 2017 Oct 1;174:171–8.
34. Bardosh K, Inthavong P, Xayaheuang S, Okello AL. Controlling parasites, understanding practices: The biosocial complexity of a One Health intervention for neglected zoonotic helminths in northern Lao PDR. *Social Science & Medicine*. 2014 Nov 1;120:215–23.
35. Okello AL, Thomas L, Inthavong P, Ash A, Khamlome B, Keokamphet C, et al. Assessing the impact of a joint human-porcine intervention package for *Taenia solium* control: Results of a pilot study from northern Lao PDR. *Acta Tropica*. 2016 Jul 1;159:185–91.

36. Duangsong R, Promthet S, Thaewnongiew K. Development of a community-based approach to opisthorchiasis control. *Asian Pacific journal of cancer prevention*: APJCP. 2013 Nov 30;14(11):7039–43.
37. Suroso T, Margono SS, Wandura T, Ito A. Challenges for control of taeniasis/cysticercosis in Indonesia. *Parasitology international* [Internet]. 2006 [cited 2022 Jul 27];55 Suppl(SUPPL.). Available from: <https://pubmed.ncbi.nlm.nih.gov/16380290/>
38. Belizario V, Isidore Totanes F, Ann Asuncion C, De Leon W, Jorge M, Ang C, et al. Integrated surveillance of pulmonary tuberculosis and paragonimiasis in Zamboanga del Norte, the Philippines. *Pathogens and global health*. 2014;108(2):95–102.
39. Belizario VY, Jorge II MC, Ng JV, Mistica MS, Lam HY, Anino MRC, et al. A Model for Integrating Paragonimiasis Surveillance and Control with Tuberculosis Control Program. *Southeast Asian Journal of Tropical Medicine and Public Health*. 2016;47(4):625–37.
40. delos Trinos JPC, Sison OT, Anino MRC, Lacuna JDM, Jorge MC, Belizario VY. Identification of suspected paragonimiasis-endemic foci using a questionnaire and detection of *Paragonimus* ova using the Ziehl-Neelsen technique in Zamboanga Region, the Philippines. *Pathogens and global health*. 2020 Apr 2;114(3):127–35.
41. Clausen JH, Madsen H, Murrell KD, Bui TN, Nguyen NT, Do DT, et al. The effectiveness of different intervention strategies for the prevention of zoonotic metacercariae infection in cultured fish. *Aquaculture*. 2013 Dec 5;416–417:135–40.
42. Clausen JH, Madsen H, Murrell KD, Van PT, Thu HNT, Do DT, et al. Prevention and Control of Fish-borne Zoonotic Trematodes in Fish Nurseries, Vietnam. *Emerging Infectious Diseases*. 2012 Aug;18(9):1438.
43. Clausen JH, Madsen H, Van PT, Dalsgaard A, Murrell KD. Integrated parasite management: path to sustainable control of fishborne trematodes in aquaculture. *Trends in Parasitology*. 2015 Jan 1;31(1):8–15.
44. Madsen H, Thien PC, Nga HTN, Clausen JH, Dalsgaard A, Murrell KD. Two-year intervention trial to control of fish-borne zoonotic trematodes in giant gourami (*Osphronemus goramy*) and striped catfish (*Pangasianodon hypophthalmus*) in nursery ponds in the Mekong Delta, Vietnam. *Acta tropica*. 2015 Dec 1;152:201–7.
45. Sripa B, Tangkawattana S, Laha T, Kaewkes S, Mallory FF, Smith JF, et al. Toward integrated opisthorchiasis control in northeast Thailand: the Lawa project. *Acta tropica*. 2015 Jan 1;141(Pt B):361–7.
46. Sripa B, Tangkawattana S, Sangnikul T. The Lawa model: A sustainable, integrated opisthorchiasis control program using the EcoHealth approach in the Lawa Lake region of Thailand. *Parasitology international*. 2017 Aug 1;66(4):346–54.

47. Yoshida I, Horie O, Akkhavong K. Predictors of hookworm and *Opisthorchis viverrini* infection among adolescents in urban Laos: a cross-sectional study. *Research and Reports in Tropical Medicine*. 2019 May 16;10:31–41.
48. World Health Organization. Towards universal coverage for preventive chemotherapy for Neglected Tropical Diseases: Guidance for assessing “who is being left behind and why” [Internet]. 2017 [cited 2023 Sep 5] p. 94. Available from: <https://www.who.int/publications-detail-redirect/WHO-FWC-17.3>
49. Naqvi FA, Das JK, Salam RA, Raza SF, Lassi ZS, Bhutta ZA. Interventions for Neglected Tropical Diseases Among Children and Adolescents: A Meta-analysis. *Pediatrics* [Internet]. 2022 May 1 [cited 2022 Jul 29];149(Suppl 5). Available from: <https://pubmed.ncbi.nlm.nih.gov/35503336/>
50. Hasanica N, Catak A, Mujezinovic A, Begagic S, Galijašević K, Oruč M. The Effectiveness of Leaflets and Posters as a Health Education Method. *Materia Socio Medica*. 2020 Jun 1;32:135.
51. Ejike CU, Oluwole AS, Omitola OO, Bayegun AA, Shoneye IY, Akeredolu-Ale BI, et al. Schisto and Ladders version 2: a health educational board game to support compliance with school-based mass drug administration with praziquantel - a pilot study. *Int Health*. 2021 Apr 27;13(3):281–90.
52. Freeman MC, Ogden S, Jacobson J, Abbott D, Addiss DG, Amnie AG, et al. Integration of water, sanitation, and hygiene for the prevention and control of neglected tropical diseases: a rationale for inter-sectoral collaboration. *PLoS Negl Trop Dis*. 2013;7(9):e2439.
53. Garn JV, Sclar GD, Freeman MC, Penakalapati G, Alexander KT, Brooks P, et al. The impact of sanitation interventions on latrine coverage and latrine use: A systematic review and meta-analysis. *International Journal of Hygiene and Environmental Health*. 2017 Apr 1;220(2):329–40.
54. Ramiandrasoa NS, Ravoniarimbinina P, Solofoniaina AR, Andrianjafy Rakotomanga IP, Andrianarisoa SH, Molia S, et al. Impact of a 3-year mass drug administration pilot project for taeniasis control in Madagascar. Scitutto E, editor. *PLoS Negl Trop Dis*. 2020 Sep 18;14(9):e0008653.
55. Nsadha Z, Rutebarika C, Ayebazibwe C, Aloys B, Mwanja M, Poole EJ, et al. Control trial of porcine cysticercosis in Uganda using a combination of the TSOL18 vaccination and oxfendazole. *Infectious Diseases of Poverty*. 2021 Mar 20;10(1):34.
56. Jayashi CM, Kyngdon CT, Gauci CG, Gonzalez AE, Lightowlers MW. Successful immunization of naturally reared pigs against porcine cysticercosis with a recombinant oncosphere antigen vaccine. *Vet Parasitol*. 2012 Sep 10;188(3–4):261–7.

57. Amarir F, Rhalem A, Sadak A, Raes M, Oukessou M, Saadi A, et al. Control of cystic echinococcosis in the Middle Atlas, Morocco: Field evaluation of the EG95 vaccine in sheep and cesticide treatment in dogs. *PLoS Negl Trop Dis*. 2021 Mar 8;15(3):e0009253.
58. Bürli C, Harbrecht H, Odermatt P, Sayasone S, Chitnis N. Mathematical analysis of the transmission dynamics of the liver fluke, *Opisthorchis viverrini*. *Journal of theoretical biology*. 2018 Feb 14;439:181–94.
59. Kim CS, Smith JF, Suwannatrai A, Echaubard P, Wilcox B, Kaewkes S, et al. Role of socio-cultural and economic factors in cyprinid fish distribution networks and consumption in Lawa Lake region, Northeast Thailand: Novel perspectives on *Opisthorchis viverrini* transmission dynamics. *Acta Trop*. 2017 Jun;170:85–94.
60. Castonguay FM, Sokolow SH, De Leo GA, Sanchirico JN. Cost-effectiveness of combining drug and environmental treatments for environmentally transmitted diseases. *Proc Biol Sci*. 2020 Aug 26;287(1933):20200966.
61. Albonico M, Levecke B, LoVerde PT, Montresor A, Prichard R, Vercruyse J, et al. Monitoring the efficacy of drugs for neglected tropical diseases controlled by preventive chemotherapy. *J Glob Antimicrob Resist*. 2015 Dec;3(4):229–36.
62. Johansen MV, Lier T, Sithithaworn P. Towards improved diagnosis of neglected zoonotic trematodes using a One Health approach. *Acta Tropica*. 2015 Jan 1;141:161–9.
63. Taeniasis/Cysticercosis [Internet]. [cited 2023 May 1]. Available from: <https://www.who.int/news-room/fact-sheets/detail/taeniasis-cysticercosis>
64. Molia S, Saillard J, Dellagi K, Cliquet F, Bart JM, Rotureau B, et al. Practices in research, surveillance and control of neglected tropical diseases by one health approaches: A survey targeting scientists from french-speaking countries. *PLoS Neglected Tropical Diseases*. 2021 Mar 1;15(3).
65. Bharadwaj M, Bengtson M, Golverdingen M, Waling L, Dekker C. Diagnosing point-of-care diagnostics for neglected tropical diseases. *PLOS Neglected Tropical Diseases*. 2021 Jun 17;15(6):e0009405.
66. Bardosh K, Berbri I, Ducrotoy M, Bouslikhane M, Fassi Fihri O, Welburn S. Zoonotic Encounters at the Slaughterhouse: Pathways and Possibilities for the Control of Cystic Echinococcus in Northern Morocco. *Journal of Biosocial Science*. 2016 Sep 1;48:S92–115.



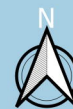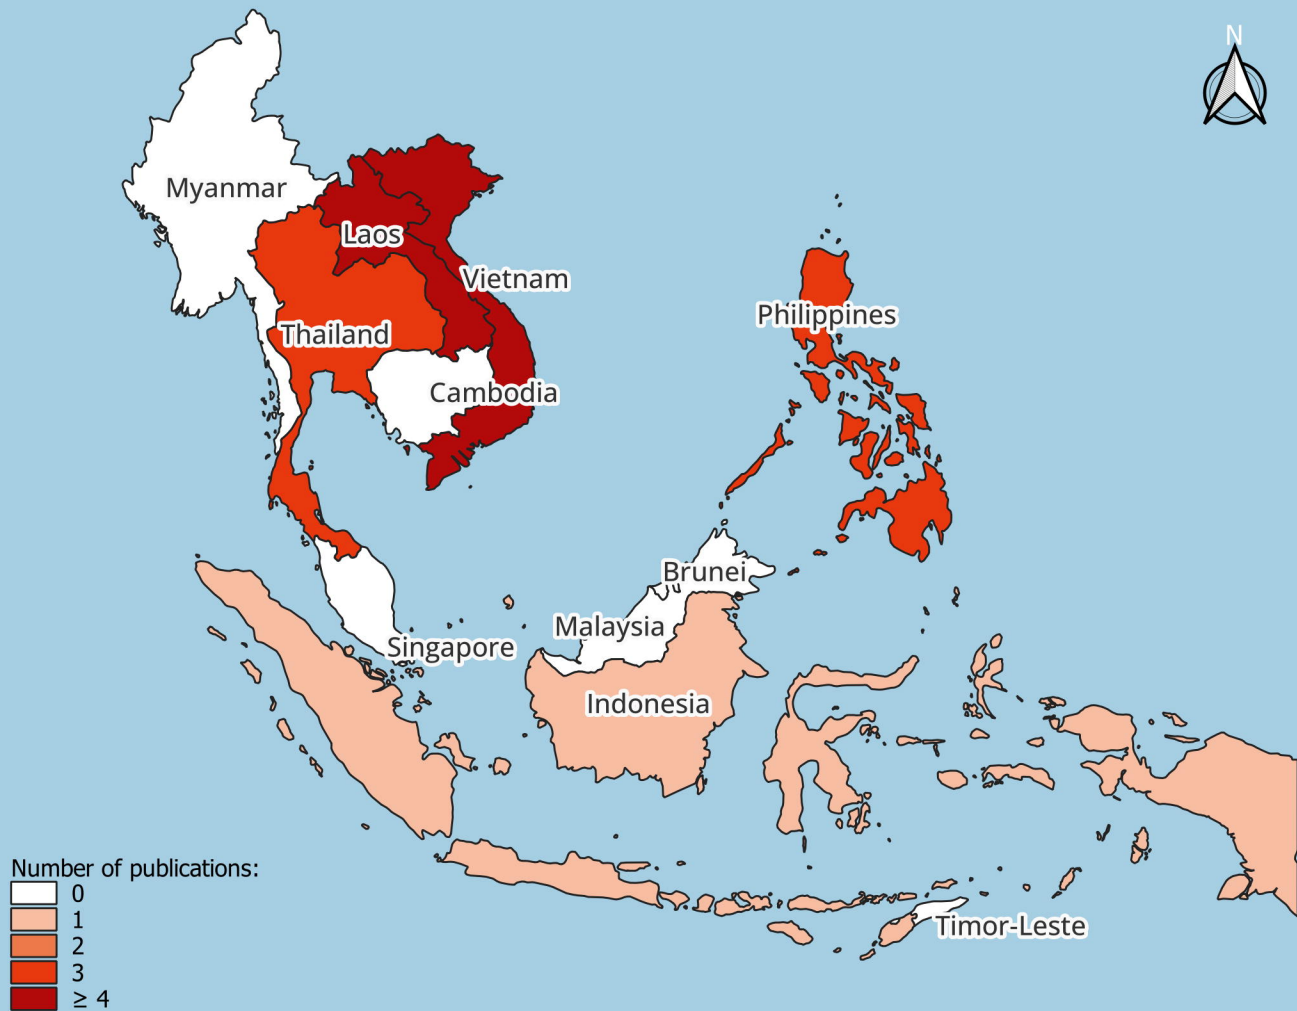

Number of publications:

- 0
- 1
- 2
- 3
- ≥ 4

## Identification of studies via databases

### Identification

Records identified from databases (n= 1725):

- PubMed (n= 98)
- Web of Science (n= 1529)
- Ovid Medline (n= 98)

Records removed *before screening*:

- Duplicate records removed (n= 185)

### Screening

Records screened at the title and abstract level:  
(n= 1540)

Records excluded:

- Published outside of the scope of interest (n= 1435)

### Eligibility

Full-text articles assessed for eligibility: (n= 105)

Full-text articles excluded: (n=90)

- Published outside the scope of interest (n= 87)
- Abstract only: (n= 2)
- Not in English (n= 1)

### Included

Studies included in the final synthesis: (n= 15)
